# Supplementary material for: MicroRNA-29b Contributes to Collagens Imbalance in Human Osteoarthritic and Dedifferentiated Articular Chondrocytes
Source: Hindawi journal article supplement (doi:10.1155/2017/9792512), 2017-01-01
Supplement: f1 [file 9792512.f1.pdf]

Figure S1

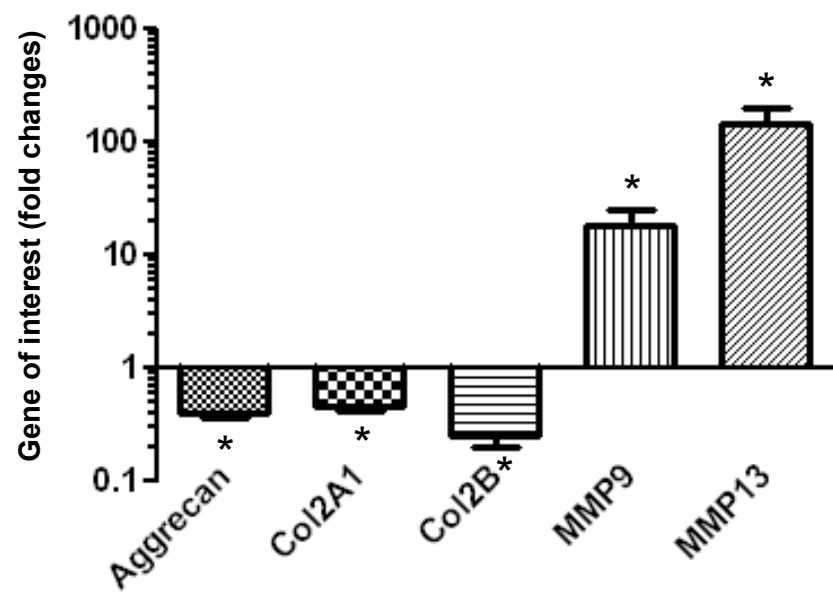

Table S1

| <b>Patients</b> | <b>Category</b> | <b>Age (years)</b> | <b>Gender</b> | <b>BMI (kg/m<sup>2</sup>)</b> | <b>Cartilage source</b> |
|-----------------|-----------------|--------------------|---------------|-------------------------------|-------------------------|
| 1               | Control         | 38                 | M             | 31                            | Knee                    |
| 2               | Control         | 39                 | M             | 27                            | Hip                     |
| 3               | Control         | 78                 | F             | 28                            | Knee                    |
| 4               | Control         | 83                 | F             | 18                            | Hip                     |
| 5               | Control         | 75                 | M             | 34                            | Hip                     |
| Mean/group      | -               | 62.6               | 2 F/3 M       | 27.4                          | 2 Knee/3 Hip            |
| 6               | OA              | 62                 | F             | 29                            | Knee                    |
| 7               | OA              | 68                 | F             | 23                            | Knee                    |
| 8               | OA              | 63                 | F             | 25                            | Knee                    |
| 9               | OA              | 64                 | F             | 28                            | Hip                     |
| 10              | OA              | 69                 | F             | 29                            | Hip                     |
| 11              | OA              | 60                 | F             | 27                            | Hip                     |
| 12              | OA              | 62                 | F             | 23                            | Hip                     |
| 13              | OA              | 56                 | F             | 28                            | Hip                     |
| 14              | OA              | 79                 | F             | 24                            | Hip                     |
| 15              | OA              | 63                 | F             | 28                            | Hip                     |
| 16              | OA              | 60                 | M             | 26                            | Knee                    |
| 17              | OA              | 55                 | M             | 26                            | Knee                    |
| 18              | OA              | 69                 | M             | 29                            | Hip                     |
| 19              | OA              | 69                 | M             | 24                            | Hip                     |
| 20              | OA              | 57                 | M             | 21                            | Hip                     |
| 21              | OA              | 63                 | M             | 25                            | Hip                     |
| 22              | OA              | 54                 | M             | 30                            | Hip                     |
| 23              | OA              | 54                 | M             | 29                            | Hip                     |
| Mean/group      | -               | 62.5               | 10 F/8 M      | 26.5                          | 5 Knee/13 Hip           |

Table S2

| Gene          | Primer Sequence                       | Size (bp) | Tm (°C) |
|---------------|---------------------------------------|-----------|---------|
| human ACAN    | Sens: 5'-TCGAGGACAGCGAGGCC-3'         | 84        | 63      |
|               | Antisens: 5'-TCGAGGGTGTAGCGTGTAGAGA   |           |         |
| mouse COL1A1  | Sens: 5'-GTCCCGCTGGTCAAGATG-3'        | 120       | 59      |
|               | Antisens: 5'-CTCCAGCCTTTCCAGGTTCT-3'  |           |         |
| human COL2A1  | Sens: 5'-GGCCAGGATGTCCAGGAGGC-3'      | 197       | 60      |
|               | Antisens: 5'-GGGCAGATGGGGCAGCACTC-3'  |           |         |
| mouse COL2A1  | Sens: 5'-TGGTATTCTGGAGCCAAAG-3'       | 103       | 59      |
|               | Antisens: 5'-ACCAGTTGCACCTTGAGGAC-3'  |           |         |
| human COL2B   | Sens: 5'-TCTGCCACGAGGTCCAGGGG-3'      | 176       | 65      |
|               | Antisens: 5'-AGGGCCAGGATGTCCGGCAA-3'  |           |         |
| mouse COL10A1 | Sens: 5'-TTCATCCCATACGCCATAAAG-3'     | 103       | 57      |
|               | Antisens: 5'-AGGGACCTGGGTGTCCTC-3'    |           |         |
| human MMP9    | Sens: 5'-AGGGACCACAACCTCGTCATC-3'     | 141       | 58      |
|               | Antisens: 5'-CATCGTCATCCAGTTTGGTG-3'  |           |         |
| human MMP13   | Sens: 5'-TGGTGGTGATGAAGATGATTTG-3'    | 161       | 57      |
|               | Antisens: 5'-TCTAAGCCGAAGAAAGACTGC-3' |           |         |
| human RPS29   | Sens: 5'-CAGACACGACAAGAGCGAGA-3'      | 69        | 63      |
|               | Antisens: 5'-GGGTCACCAGCAGCTGTACT-3'  |           |         |
| Mouse mS29    | Sens: 5'-GGAGTCACCCACGGAAGTT-3'       | 131       | 59      |
|               | Antisens: 5'-GCCTATGTCCTTCGCGTACT-3'  |           |         |
